# Supplementary material for: Synthesis of CoSnS2 hollow nanocubes with NIR-enhanced chemodynamic therapy and glutathione depletion for combined cancer therapy
Source: Royal Society of Chemistry journal article supplement (doi:10.1039/d2qm00230b), 2022-01-01
Supplement: d2qm00230b1.pdf [file d2qm00230b1.pdf]

## Supporting Information

# Synthesis of CoSnS<sub>2</sub> hollow nanocubes with NIR-enhanced chemodynamic therapy and glutathione depletion for synergistic cancer therapy

*Xuerui Zhu<sup>a,b</sup>, Zhaoyou Chu<sup>b</sup>, Benjin Chen<sup>b</sup>, Qianqian Jin<sup>a</sup>, Xuke Ma<sup>a</sup>, Juan Yang<sup>b</sup>, Yongxin Jiang<sup>b</sup>, Wannu Wang<sup>b,\*</sup>, Zhengbao Zha<sup>a,\*</sup>, Haisheng Qian<sup>b,c,\*</sup>*

*<sup>a</sup> School of Food and Biological Engineering, Hefei University of Technology, Hefei 230009, P. R. China.*

*<sup>b</sup> School of Biomedical Engineering, Research and Engineering Center of Biomedical Materials, School of Basic Medical Sciences Anhui Medical University, Hefei 230032, P. R. China.*

*<sup>c</sup> Anhui Provincial Institute of Translational Medicine, Anhui Medical University, Hefei, Anhui 230032, P. R. China*

## **Experimental Section**

### **1. Photothermal Effect of CSS.**

2.0 mL aqueous solutions of CSS NPs with different concentrations were exposed upon an 808 nm laser ( $2.0 \text{ W cm}^{-2}$ ) for 10 min. Then, CSS NPs ( $125 \mu\text{g mL}^{-1}$ ) aqueous solutions was exposed to different power of 808 nm laser. The photothermal stability of CSS NPs was further evaluated by repeating the laser on/off cycles for five times. The temperature change of CSS NPs solution was recorded at 10 s intervals by an IR thermal camera (Testo 865).

### **2. Animal model.**

Tumor models were established by injecting 4T1 cells subcutaneously into the back of female BALB/c mice (4 and 5 weeks of age). The CSS was injected when the tumor volume reached  $50 \sim 100 \text{ mm}^3$ . Animal experiments were approved by the ethics committee of Anhui Medical University (approval number: LLSC20210077). All animal-related experimental protocols were performed in accordance with the guidelines of the Association for Laboratory Animal Science and the Center for Laboratory Animal Science of Anhui Medical University.

### **3. Characterization.**

The surface morphologies, phase, fluorescence, optical properties, X-ray diffraction (XRD) and X-ray photoelectron spectra (XPS) of these products were investigated carefully according to our previous protocol or instruments. Photothermal performance, ROS, Hydroxyl radical ( $\cdot\text{OH}$ ) and singlet oxygen ( $^1\text{O}_2$ ) detection were studied via our previously reported protocol. All animal experimental protocols were investigated carefully according to our previous protocol or instruments.

## Supporting Figures

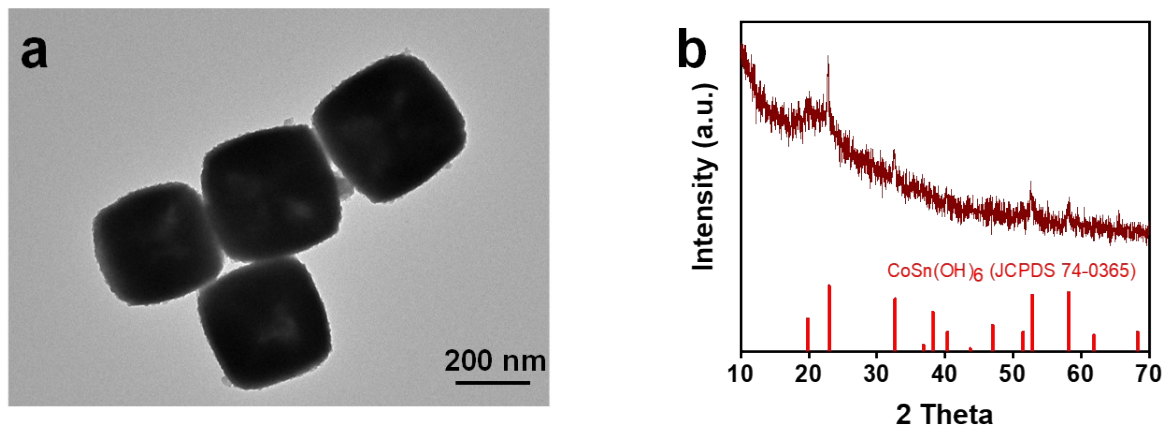

**Fig. S1** (a) TEM images of  $\text{CoSn}(\text{OH})_6$  hollow nanocubes and (b) XRD patterns of as-obtained  $\text{CoSn}(\text{OH})_6$ .

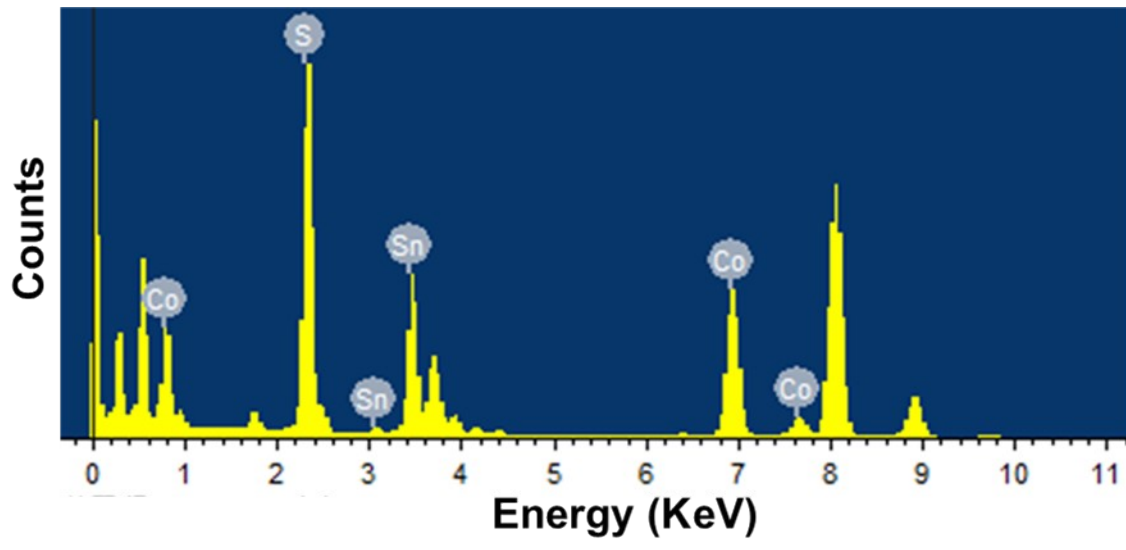

**Fig. S2** Energy dispersive X-ray spectra of the as-prepared CSS hollow nanocubes.

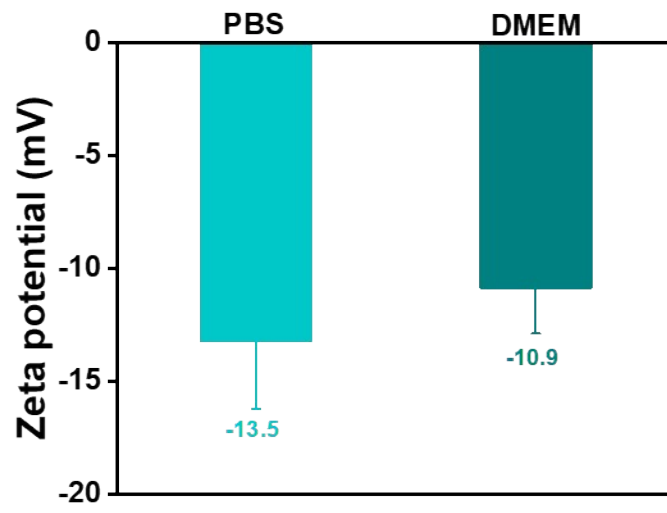

**Fig. S3** Zeta potential analyses of CSS dispersed in PBS and DMEM.

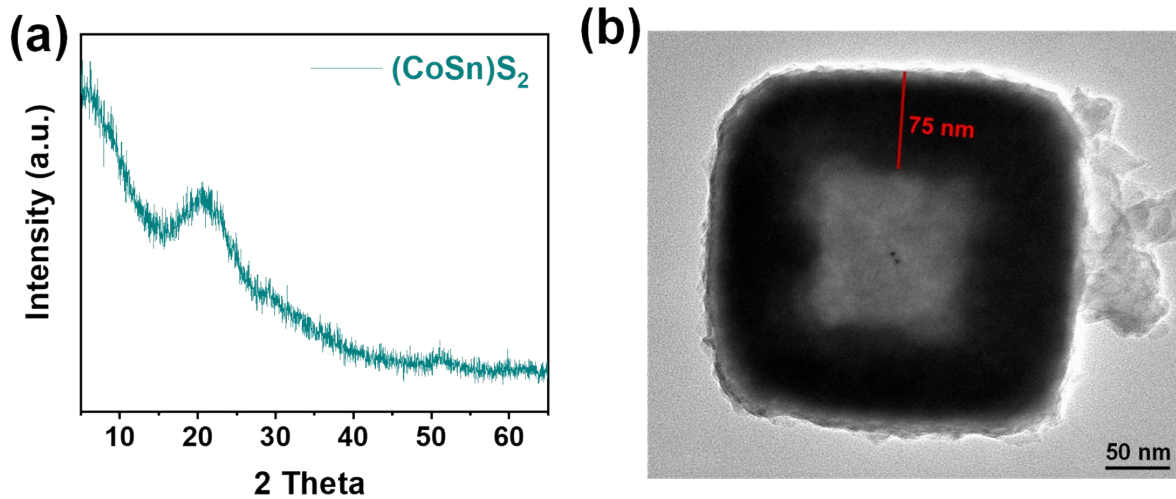

**Fig. S4** (a) XRD patterns of as-obtained (CoSn)S<sub>2</sub> and (b) TEM images for the single (CoSn)S<sub>2</sub> NPs.

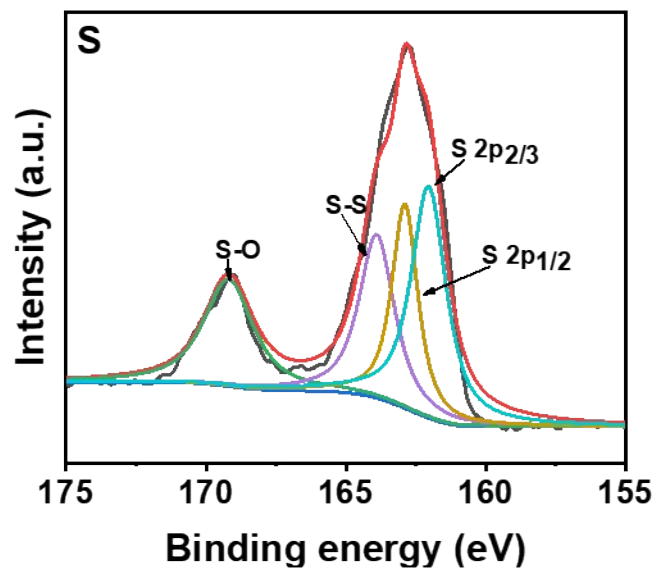

Fig. S5 S XPS spectra of as-obtained CSS.

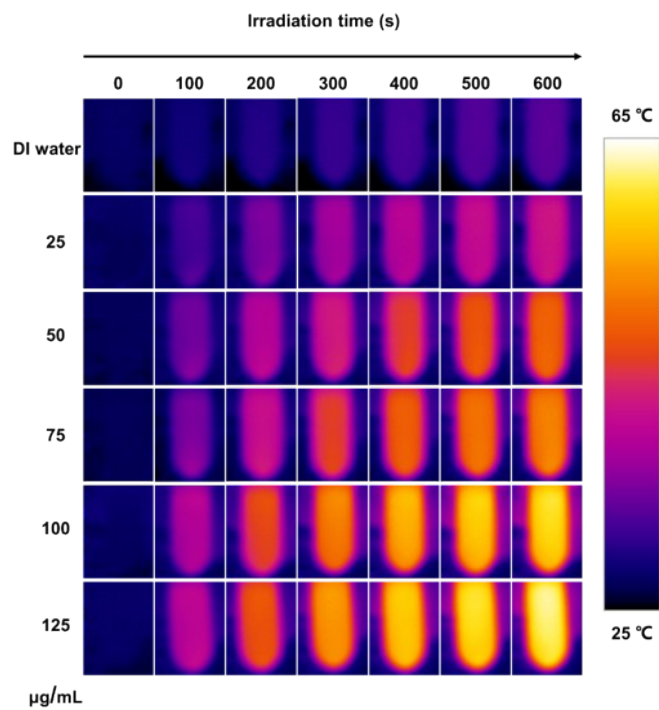

**Fig. S6** Thermal images of CSS solutions at various concentrations upon 808 nm laser irradiation ( $2 \text{ W cm}^{-2}$ ).



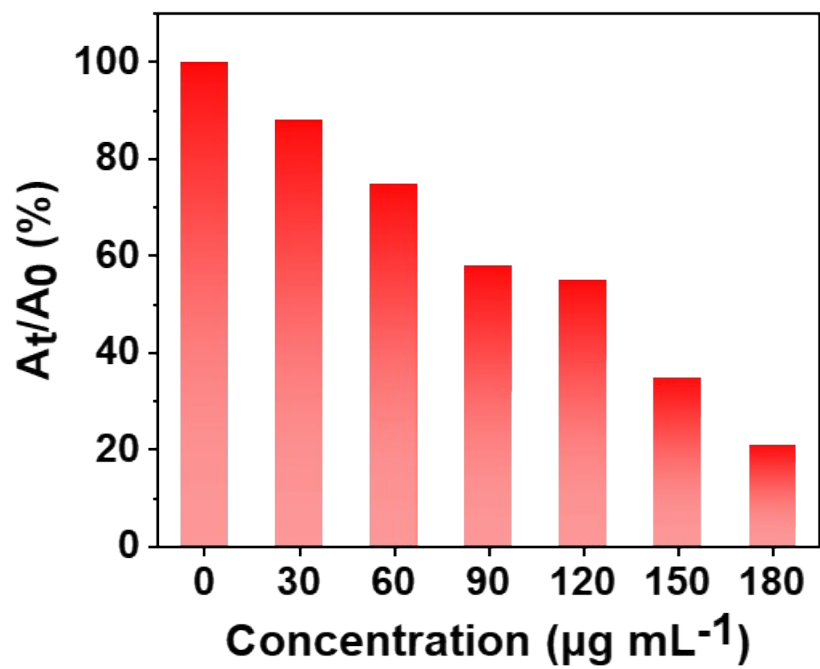

**Fig. S7** GSH depletion by CSS at different concentrations characterized by the absorbance of 5,5'-dithiobis-(2-nitrobenzoic acid) (DTNB).

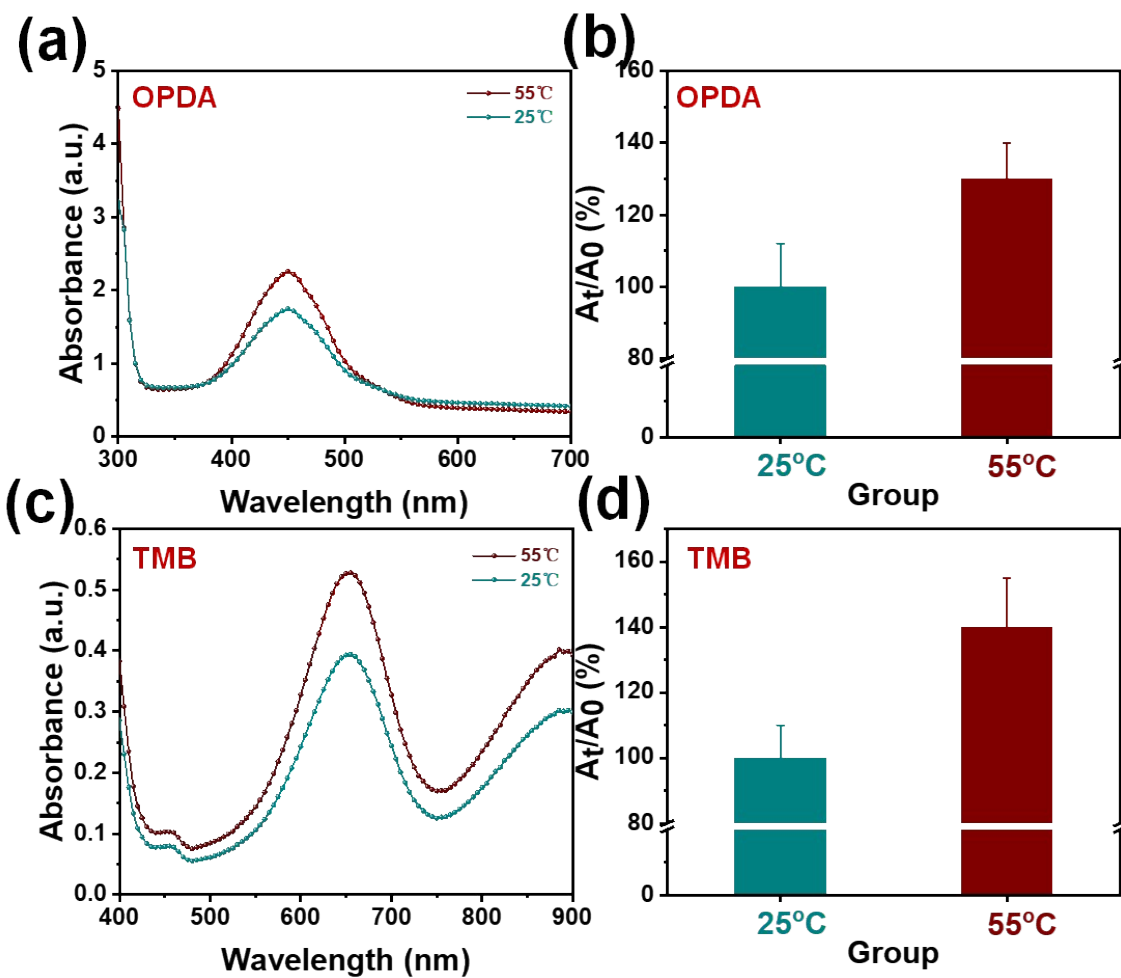

**Fig. S8** Fenton catalytic effect of CSSs at different temperature (25°C/55°C) via OPDA and TMB probes.

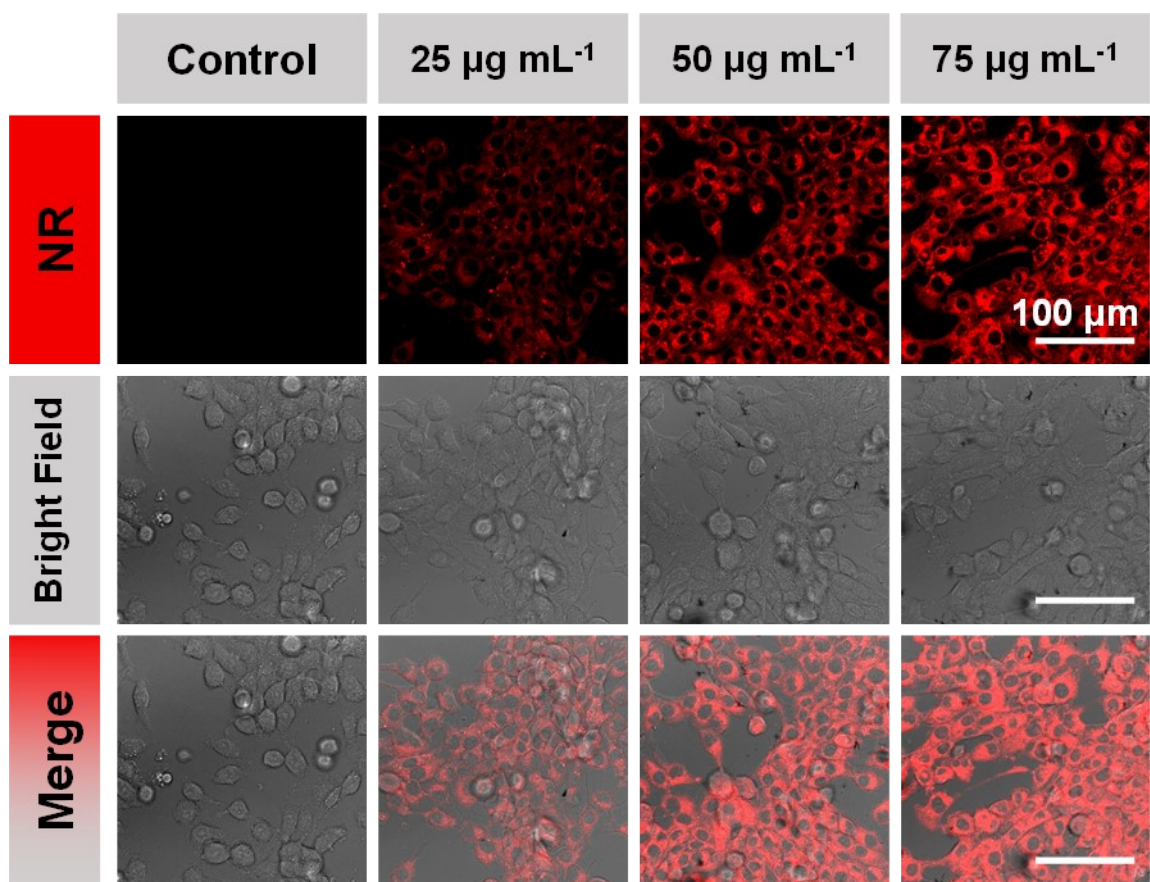

**Fig. S9** CLSM images of 4T1 cells after 4 h incubation with CSS at different concentration (0, 25, 50, 75  $\mu\text{g mL}^{-1}$ ).

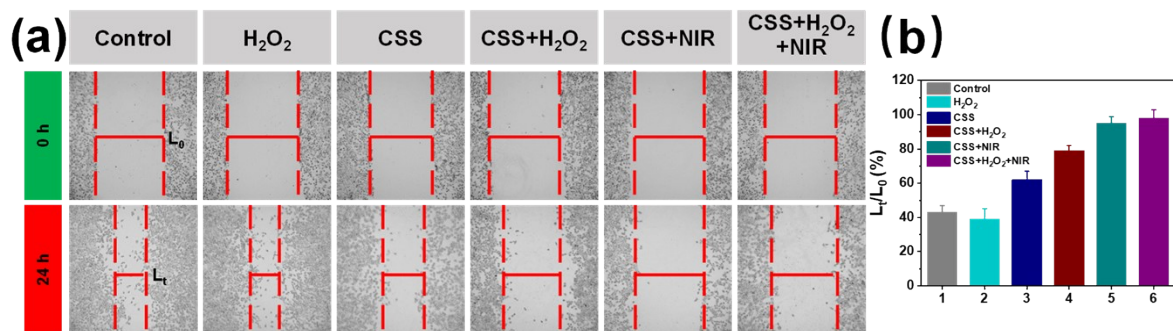

**Fig. S10** Results of different experimental groups of the scratching experiment and statistical histogram.

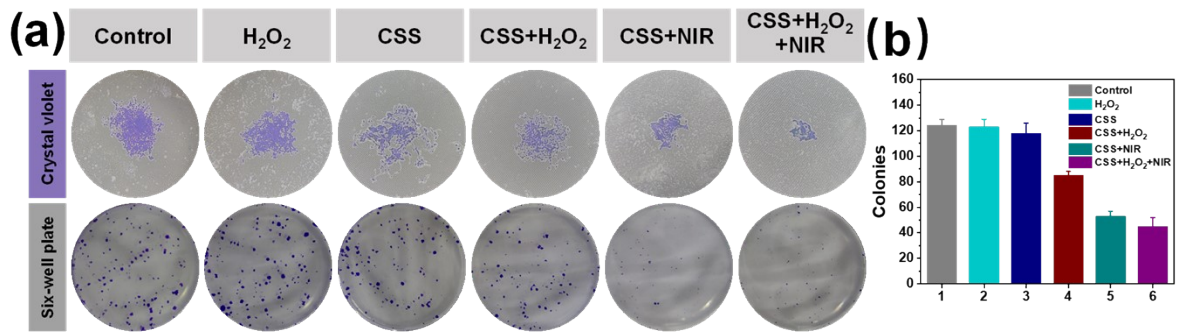

**Fig. S11** Results of different experimental groups of plate cell clone formation experiments and statistical histograms.

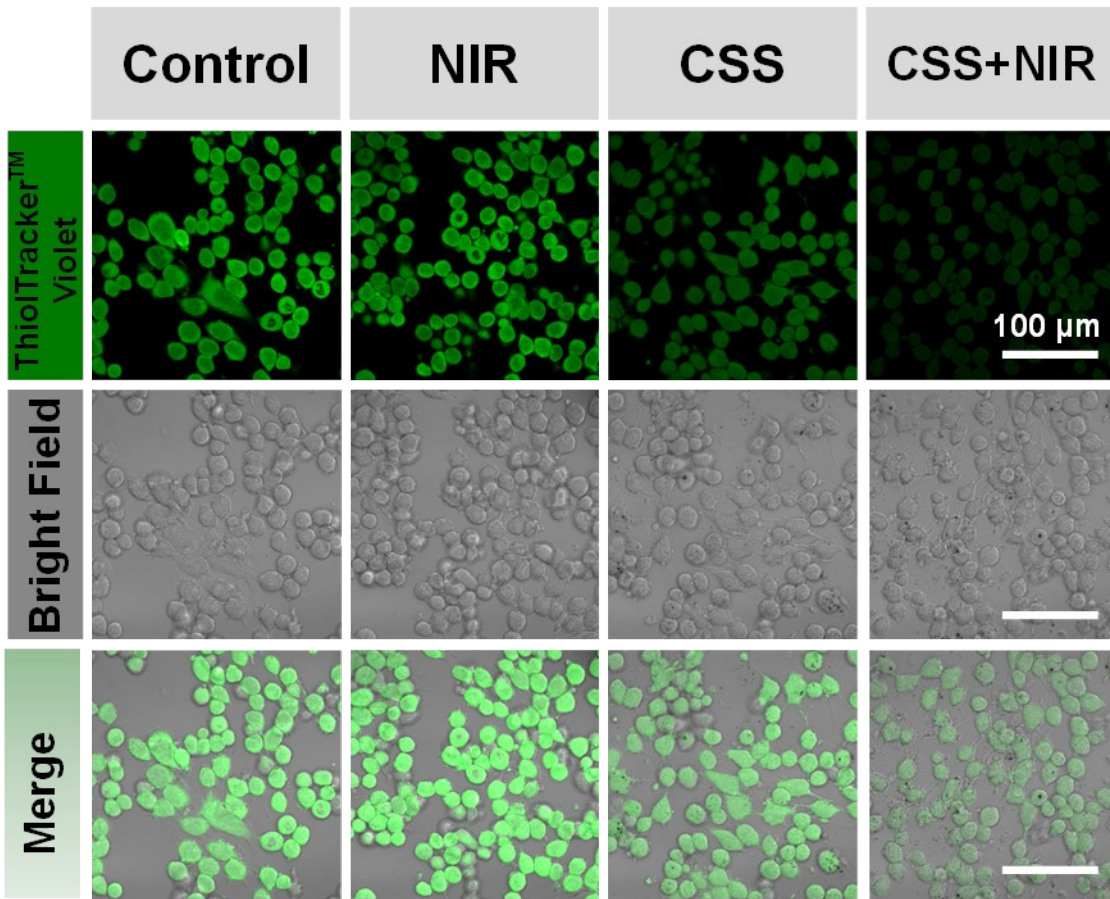

**Fig. S12** CLSM images of 4T1 cells for GSH analysis stained by Thiol-Tracker™ Violet after incubation with different groups.

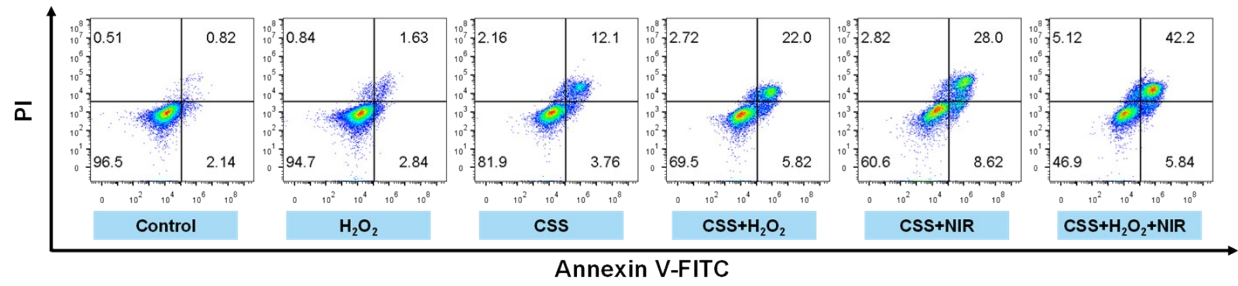

**Fig. S13** Flow cytometric analysis of 4T1 cells apoptosis induced by different treatments with Annexin V-FITC/PI staining.

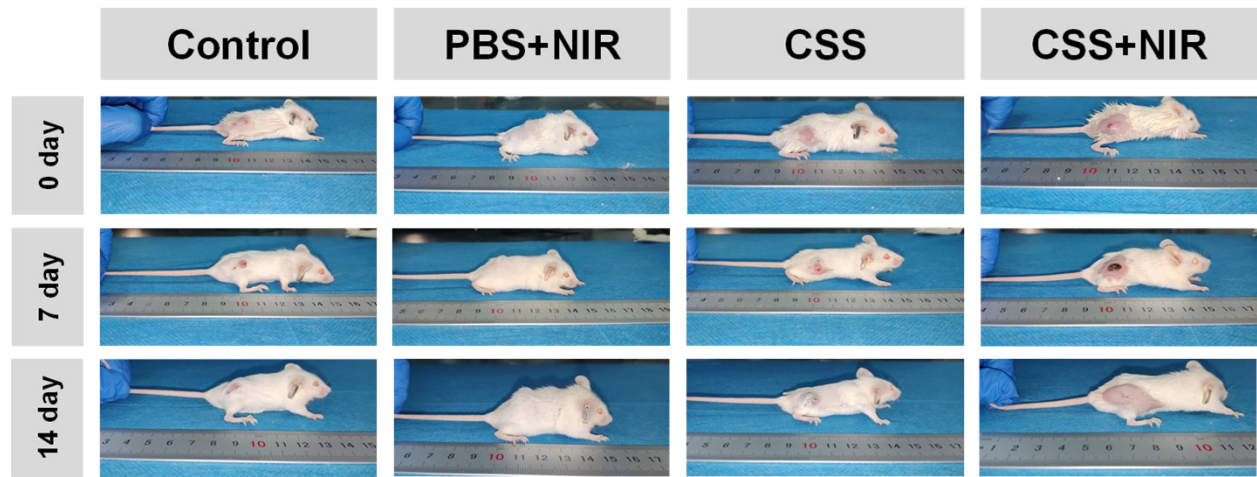

**Fig. S14** Representative mice from different treatment groups.



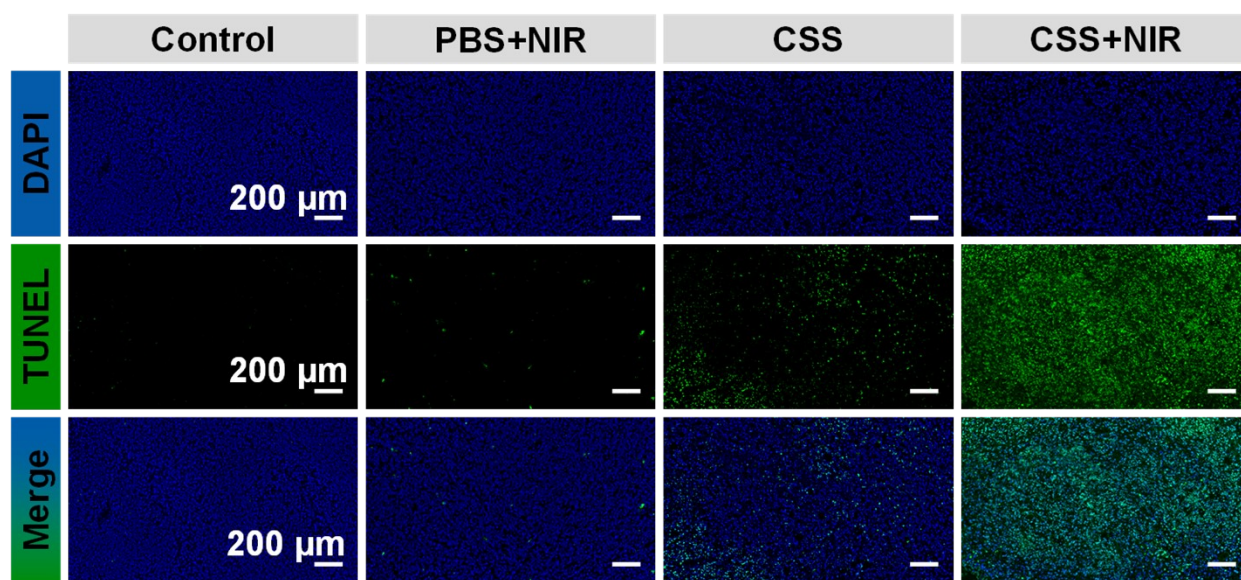

Fig. S15 TUNEL staining images of excised tumors of different treatments group on the 14th day.

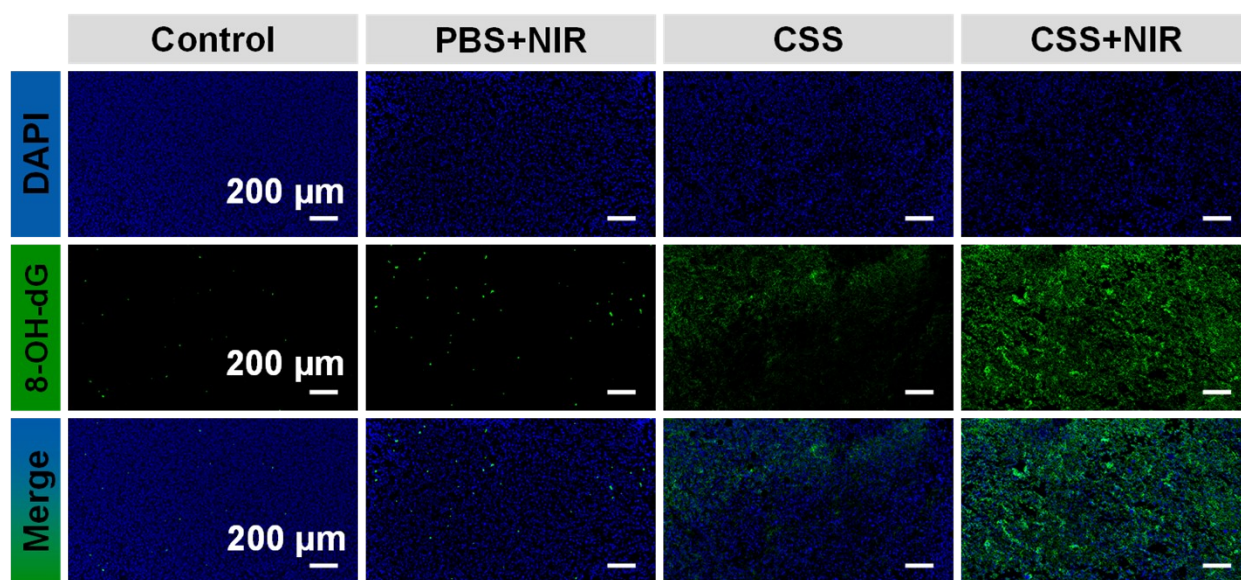

**Fig. S16** 8-OH-dG staining images of excised tumors of different treatments group on the 14th day.

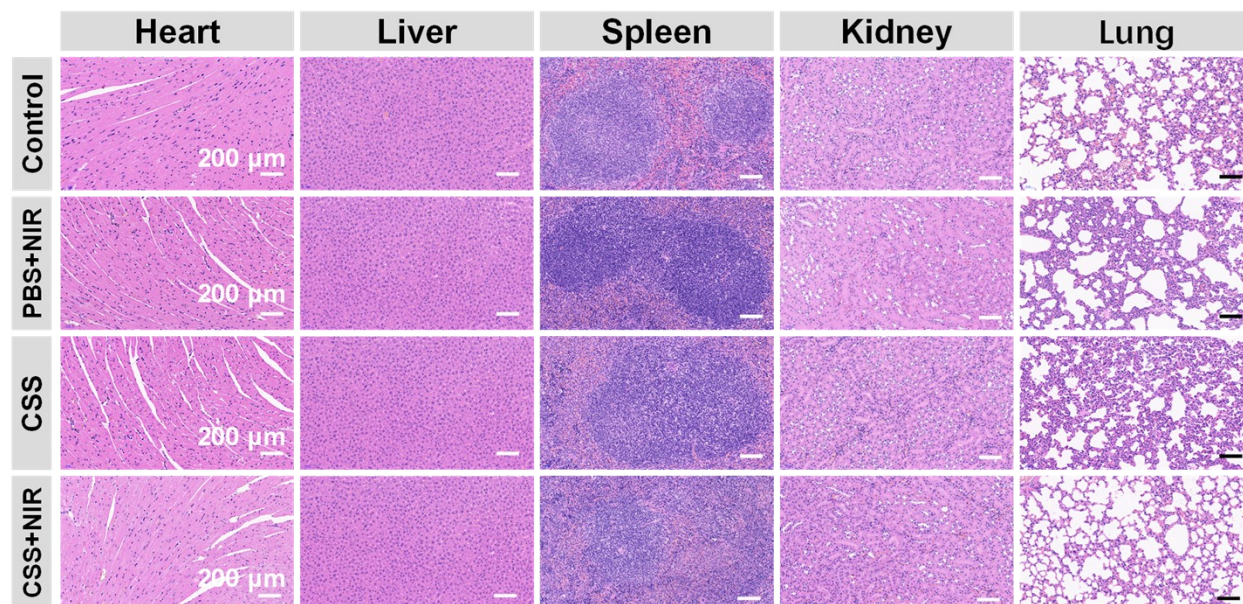

**Fig. S17** Hematoxylin and eosin (H&E) stained images of major organs (heart, liver, spleen, kidney, and lung) of mice post-injection of CSS nanoparticles.



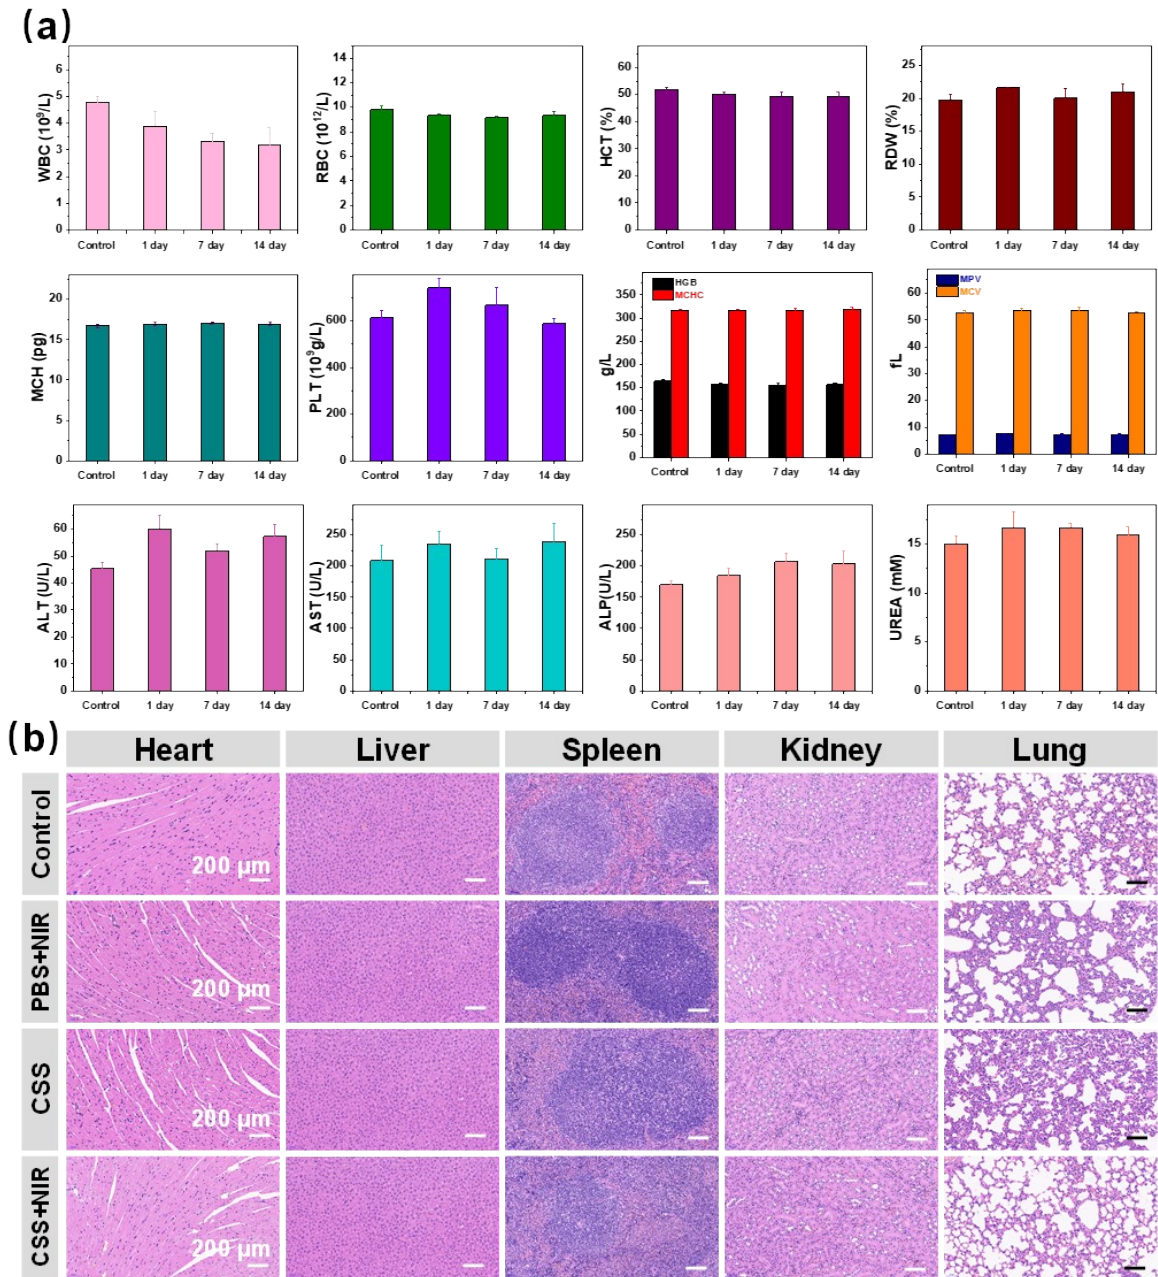

**Fig. S18** *In vivo* toxicology assays of the CSS. (a) blood panel analysis and blood biochemistry test of healthy mice after intravenous injection of CSS NPs ( $10 \text{ mg kg}^{-1}$ ) at different days. (b) H&E staining images of major organs (heart, liver, spleen, kidney, lung) of the mice after injection of CSS at different time.

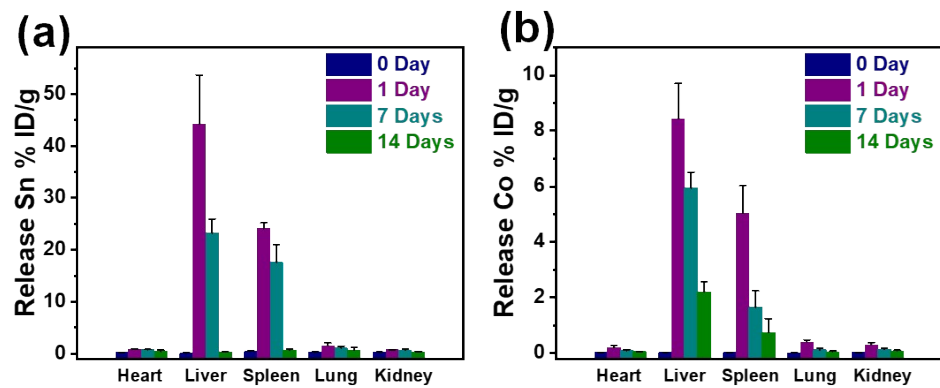

**Fig.S19** Ion distribution in the main organs (heart, liver, spleen, lung and kidney) on 0, 1, 7 and 14 days (a) *In vivo* distribution of tin ions (b) *In vivo* distribution of cobalt ions.

**Table S1** Element scale in CSS by energy dispersive X-ray spectra.

| <b>Element</b> | <b>Weight %</b> | <b>Atomic %</b> |
|----------------|-----------------|-----------------|
| S K            | 30.24           | 54.55           |
| Co K           | 23.20           | 22.77           |
| Sn K           | 46.56           | 22.69           |
| Total          | 100.00          | 100.00          |
